# Supplementary material for: AAV-Mediated Restoration of Dystrophin-Dp71 in the Brain of Dp71-Null Mice: Molecular, Cellular and Behavioral Outcomes
Source: MDPI journal article supplement (doi:10.3390/cells13080718), 2024-04-20
Supplement: s1 [file s1]

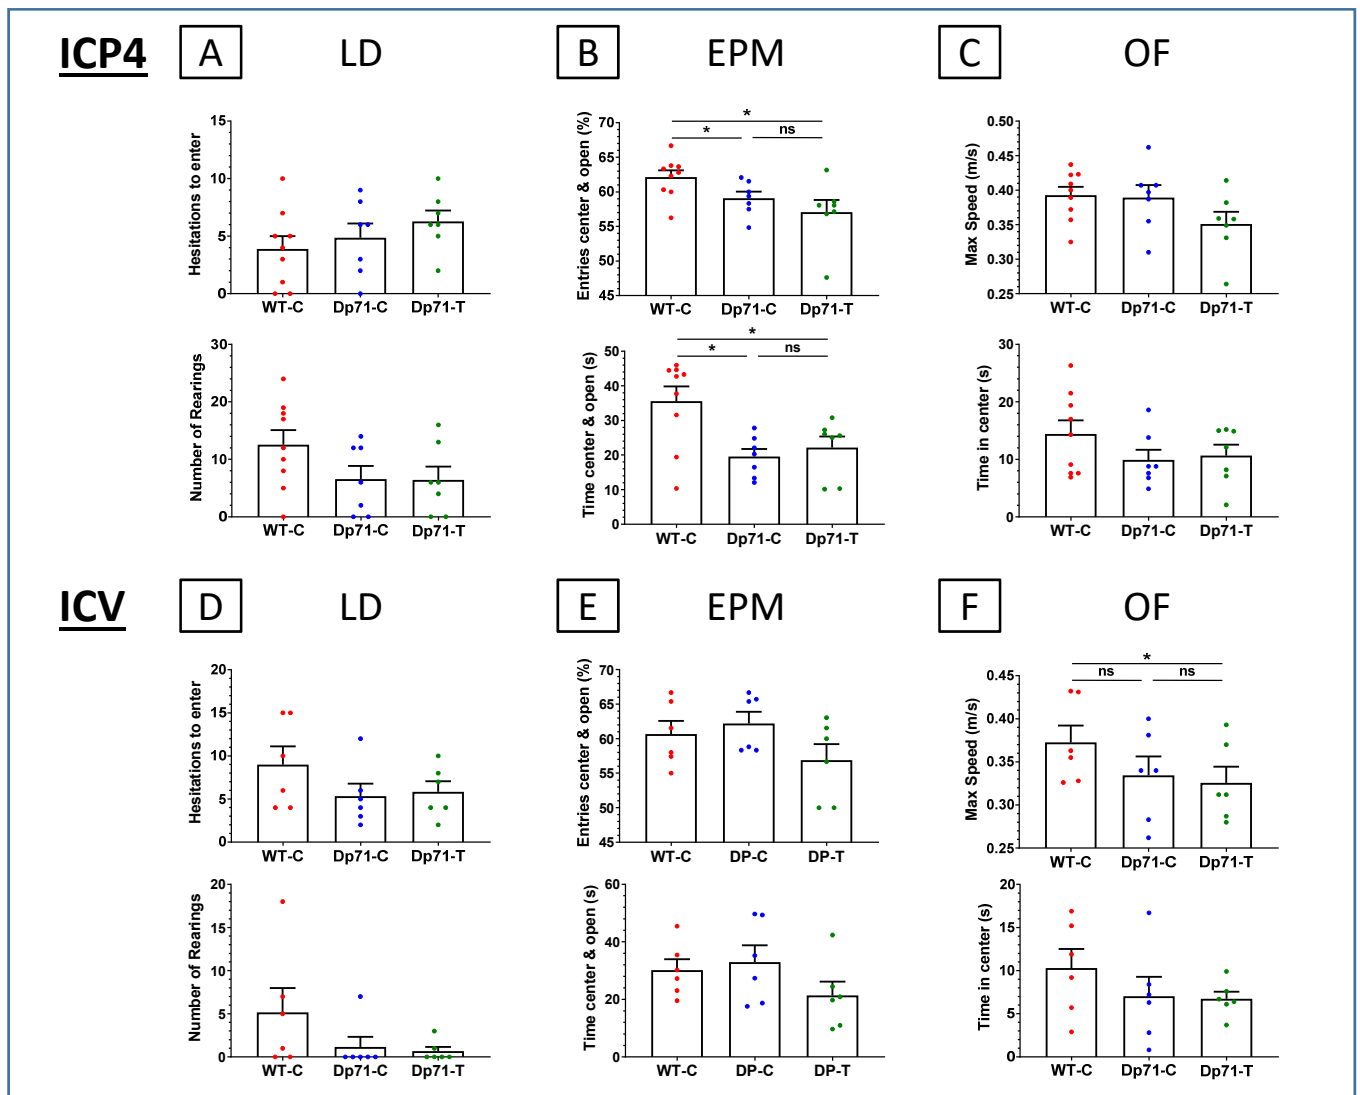

**Figure S1:** Additional parameters analyzed in the behavioral study. **(A-C)** The plots show the data recorded following intracardiac injections at P4 (IC-P4) in the three groups of mice (Dp71-T, n=7; WT-C, n=9; Dp71-C, n=7). **(A)** Number of hesitations and rearings in the light/dark choice test (LD). **(B)** Number of entries in the center and in open arms expressed as % of total number of visits in all zones of the maze, and time spent in the center and in open arms (s) in the elevated plus maze (EPM). **(C)** Maximum speed and time spent in the center (s) in the 30-min open-field exploration test (OF). **(D-F)** The plots show the data recorded following stereotaxic intracerebroventricular (ICV) injections at 6-8 weeks in the three groups of mice (Dp71-T, n=6; WT-C, n=6; Dp71-C, n=6). **(D)** Number of hesitations and rearings in the light/dark choice test (LD). **(E)** Number of entries in the center and in open arms expressed as % of total number of visits in all zones of the maze, and time spent in the center and in open arms (s) in the elevated plus maze (EPM). **(F)** Maximum speed and time spent in the center (s) in the 30-min open-field exploration test (OF). Results are means  $\pm$  SEM, \* $p$ <0.05, Mann-Whitney test.
